# Supplementary material for: Green and facile method for valorization of lignin to high-performance degradable thermosets
Source: Royal Society of Chemistry journal article supplement (doi:10.1039/d2gc03302j), 2022-01-01
Supplement: d2gc03302j1.pdf [file d2gc03302j1.pdf]

## Supporting information

### **Green and facile method for valorization of lignin to high-performance degradable thermosets**

Weiqiong Zhang<sup>1,2</sup>, Binbo Wang<sup>2,4</sup>, Xiwei Xu<sup>2,4</sup>, Hongzhi Feng<sup>2,4</sup>, Kezhen Hu<sup>2,4</sup>, Yi Su<sup>1,2</sup>, Sican Zhou<sup>1,2</sup>, Jin Zhu<sup>2</sup>, Gengsheng Weng<sup>1</sup>, Songqi Ma<sup>2,3\*</sup>

<sup>1</sup>School of Materials Science & Chemical Engineering, Ningbo University, Ningbo 315211, P. R. China;

<sup>2</sup>Key Laboratory of Bio-based Polymeric Materials Technology and Application of Zhejiang Province, Laboratory of Polymers and Composites, Ningbo Institute of Materials Technology and Engineering, Chinese Academy of Sciences, Ningbo 315201, P. R. China;

<sup>3</sup>School of Chemical and Material Engineering, Jiangnan University, Wuxi 214122, P. R. China;

<sup>4</sup>University of Chinese Academy of Sciences, Beijing 100049, P. R. China;

\*Corresponding authors: (Songqi Ma) E-mail [songqi.ma@jiangnan.edu.cn](mailto:songqi.ma@jiangnan.edu.cn).

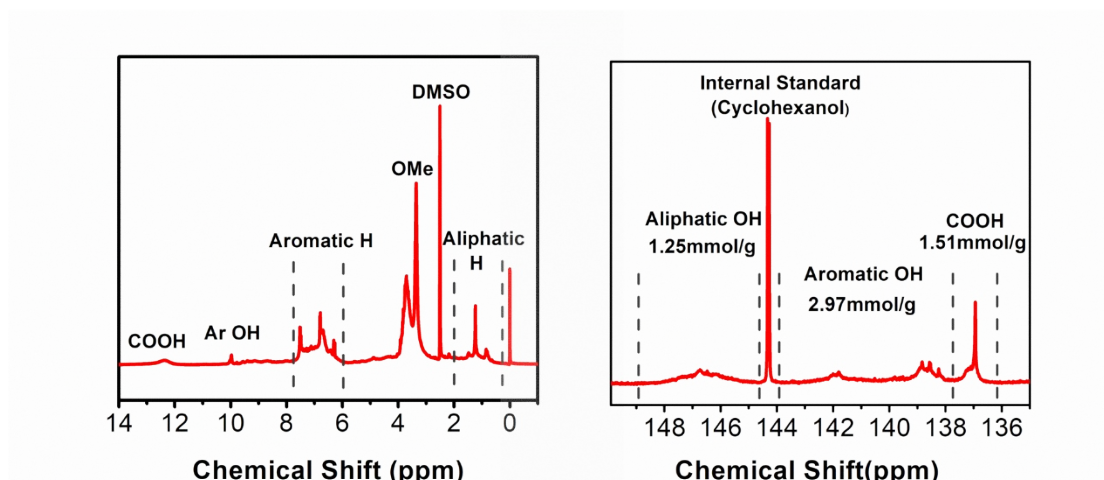

**Fig. S1** Characterization of chemical structure of lignin. (a)  $^1\text{H}$  NMR spectrum of lignin; (b)  $^{31}\text{P}$  NMR spectrum of lignin.

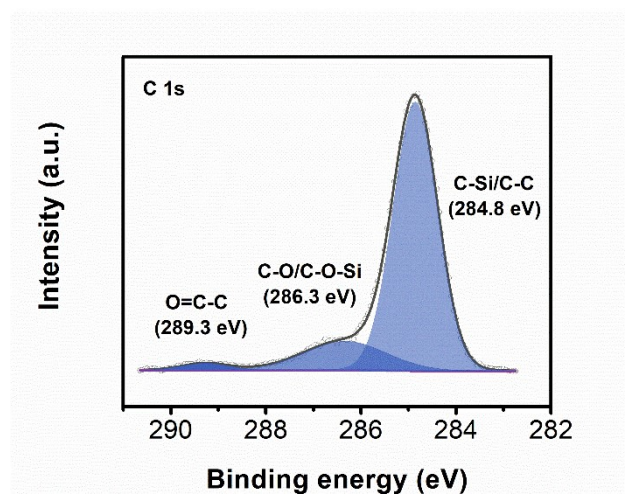

**Fig. S2** Deconvolution XPS spectra of C1s from KL-70.
